# Supplementary material for: The endoplasmic reticulum–plasma membrane tethering protein TMEM24 is a regulator of cellular Ca2+ homeostasis
Source: Oxford University Press journal article supplement (doi:10.1242/jcs.259073), 2021-11-25
Supplement: jcs259073supp.pdf [file jcs259073supp.pdf]

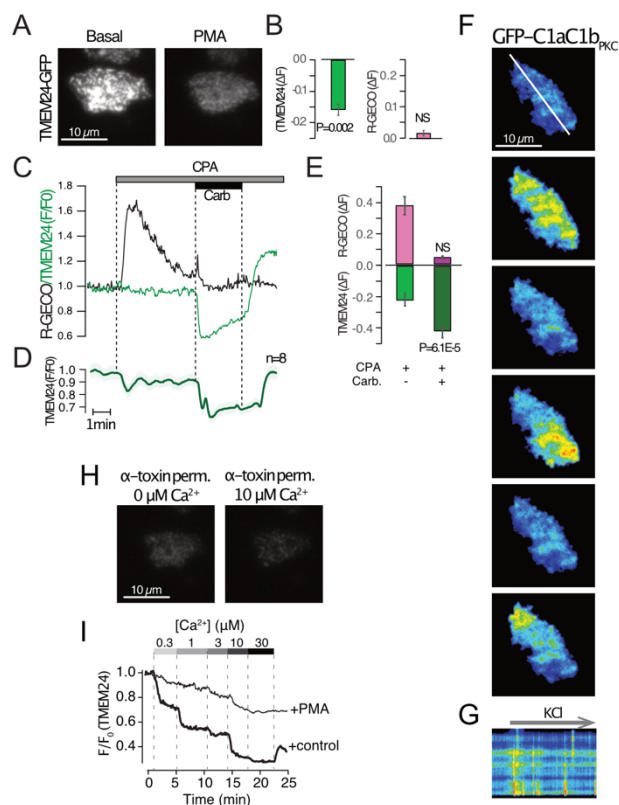

**Fig. S1.**

- (A) TIRF microscopy images GFP-TMEM24 fluorescence from a MIN6 cell exposed to 1  $\mu$ M of the DAG analogue PMA.
- (B) Quantifications of the PMA-induced dissociation of GFP-TMEM24 from the plasma membrane and the corresponding R-GECO fluorescence change in the same cells (means $\pm$ SEM for 14 cells).
- (C) TIRF microscopy recording of R-GECO (black; Ca<sup>2+</sup>) and GFP-TMEM24 (green) fluorescence from a MIN6 cells exposed to 100  $\mu$ M CPA and 10  $\mu$ M carbachol.
- (D) Average GFP-TMEM24 fluorescence change from 6 cells on one coverslip.
- (E) Quantifications of the CPA- and carbachol-induced changes in GFP-TMEM24 plasma membrane fluorescence and the corresponding R-GECO fluorescence change in the same cells (means $\pm$ SEM for 65 cells).

- (F, G) TIRF microscopy images from a MIN6 cell expressing the DAG-sensor GFP-C1aC1b<sub>PKC</sub> during depolarization with 30 mM KCl. Notice the irregular formation of DAG at the plasma membrane, apparent as transient, localized fluorescence increase events in the kymograph in D.
- (H) TIRF microscopy images GFP-TMEM24 fluorescence from an  $\alpha$ -toxin-permeabilized MIN6 cell pre-incubated with 1  $\mu$ M of the DAG analogue PMA and exposed to the indicated Ca<sup>2+</sup> buffer.
- (I) TIRF microscopy recordings of GFP-TMEM24 fluorescence from two representative  $\alpha$ -toxin-permeabilized MIN6 cells exposed (grey) or not (black) to 1  $\mu$ M PMA. Notice that preincubation with PMA leads to reduced Ca<sup>2+</sup>-induced GFP-TMEM24 plasma membrane dissociation.

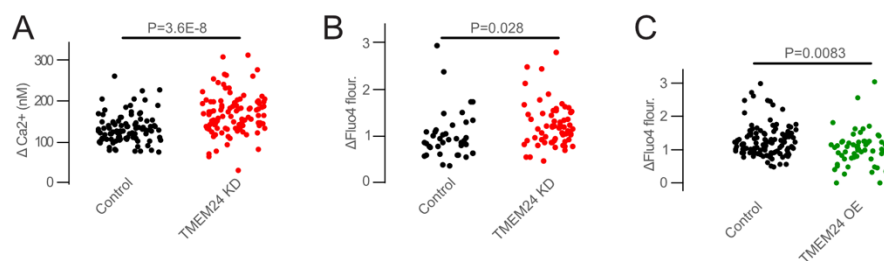

**Fig. S2.**

- (A)  $Ca^{2+}$  concentration change in response to 100  $\mu M$  CPA in MIN6 cells treated for 48h with control siRNA (black) or siRNA against TMEM24 (red).  $Ca^{2+}$  measurements were done with Fura-2.
- (B)  $Ca^{2+}$  concentration change in response to 10  $\mu M$  carbachol in MIN6 cells treated for 48h with control siRNA (black) or siRNA against TMEM24 (red).  $Ca^{2+}$  measurements were done with Fluo-4.
- (C)  $Ca^{2+}$  concentration change in response to 100  $\mu M$  CPA in MIN6 cells over-expressing mCherry (control; black) or mCherry-TMEM24 (TMEM24 OE; green).  $Ca^{2+}$  measurements were done with Fluo-4.

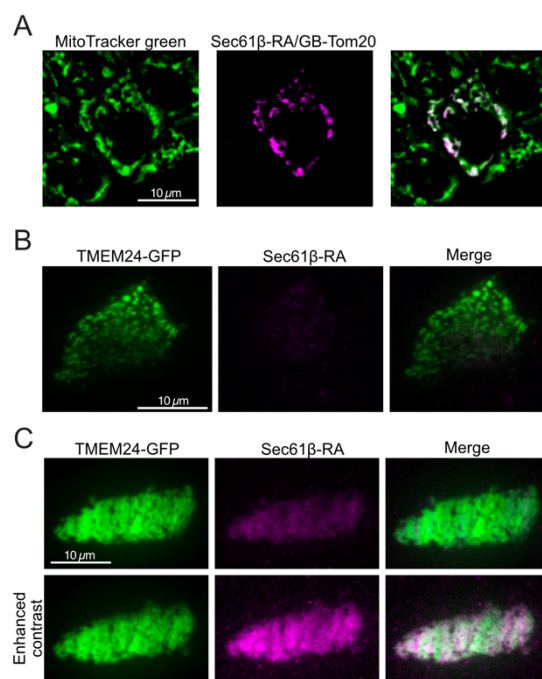

**Fig. S3.**

- (A) Confocal microscopy images of MIN6 cells expressing the ER-mitochondria contact site reporter (Sec61b-RA+ GB-Tom20; magenta) and loaded with MitoTracker green to label mitochondria (green).
- (B) TIRF microscopy images of a MIN6 cell expressing TMEM24-GFP (green) and Sec61b-RA. Notice the very weak fluorescence from Sec61b-RA in the absence of any GB expression.
- (C) TIRF microscopy images of a MIN6 cell expressing TMEM24-GFP (green) and Sec61b-RA. Notice that RA fluorescence is very dim in the absence of GB expression, but that contrast enhancement reveals RA fluorescence that overlaps with that of TMEM24-GFP, consistent with ER-localization.
